# Supplementary material
Source: PubMed Central journal article supplement (PMC3912958)
Supplement: supp_2013.092452_2013.092452.Ramsey_suppl.pdf [file supp_2013.092452_2013.092452.Ramsey_suppl.pdf]

## Stress-induced hematopoietic failure in the absence of immediate early response gene X-1 (IEX-1, IER3)

Haley Ramsey,<sup>1</sup> Qi Zhang,<sup>1</sup> Diane E. Brown,<sup>2,3</sup> David P. Steensma,<sup>4</sup> Charles P. Lin,<sup>1,5</sup> and Mei X. Wu<sup>1,5</sup>

<sup>1</sup>Wellman Center for Photomedicine, Department of Dermatology, Massachusetts General Hospital, Harvard Medical School, Boston, MA; <sup>2</sup>Department of Pathology, Massachusetts General Hospital, Harvard Medical School, Boston, MA; <sup>3</sup>Center for Comparative Medicine, Massachusetts General Hospital, Boston, MA; <sup>4</sup>Dana-Farber Cancer Institute, Department of Medical Oncology, Harvard Medical School, Boston, MA; and <sup>5</sup>Harvard-MIT Division of Health Sciences and Technology, Cambridge, USA

---

©2013 Ferrata Storti Foundation. This is an open-access paper. doi:10.3324/haematol.2013.092452  
Manuscript received on May 30, 2013. Manuscript accepted on September 12, 2013.  
Correspondence: mwu2@partners.org

## Online supplement

### 1. Methods

#### *Flow cytometry*

For HSC analysis, BM cells were stained with a lineage cocktail of rat anti-mouse antibodies against mature blood cell markers including Mac-1, Gr-1, CD3, CD4, CD8, B220, and Ter-119. These lineage positive cells were excluded using PE or PE-Cy7-conjugated goat anti-rat antibody. LSK cells were identified as lineage-negative Sca-1<sup>+</sup>c-Kit<sup>+</sup> (Lin<sup>-</sup> Sca-1<sup>+</sup> c-Kit<sup>+</sup>) cells by additional antibody combinations against Sca-1 (clone D7) from Biolegend and c-Kit (clone 2B8) from eBioscience. Long-term (LT) and short-term (ST) LSK cells were further distinguished with antibodies specific for CD135 or Flk2 (A2F10.1) and CD34 (MEC14.7) as Lin<sup>-</sup> Sca-1<sup>+</sup>c-Kit<sup>+</sup> CD34<sup>-</sup> Flk2<sup>-</sup> cells or Lin<sup>-</sup> Sca-1<sup>+</sup>c-Kit<sup>+</sup> CD34<sup>+</sup> Flk2<sup>+</sup> cells, respectively. Myeloid progenitors were recognized as IL7R $\alpha$ <sup>-</sup> Lin<sup>-</sup>c-Kit<sup>+</sup>Sca-1<sup>-</sup> cells by antibody against CD127 from Biolegend, and more committed myeloid progenitors with antibody directed at FcGR2/III (clone 93) from eBioscience in which common myeloid progenitor (CMP) was marked as Lin<sup>-</sup> IL7R $\alpha$ <sup>-</sup>c-Kit<sup>+</sup>Sca-1<sup>-</sup>CD34<sup>+</sup> FcR2/III<sup>-</sup> cells, granulocyte-monocyte progenitor (GMP) as Lin<sup>-</sup> IL7R $\alpha$ <sup>-</sup>c-Kit<sup>+</sup>Sca-1<sup>-</sup> CD34<sup>+</sup> FcR2/III<sup>+</sup> cells, and megakaryocyte-erythrocyte progenitor (MEP) as Lin<sup>-</sup> IL7R $\alpha$ <sup>-</sup> c-Kit<sup>+</sup>Sca-1<sup>-</sup> CD34<sup>-</sup> FcR2/III<sup>-</sup> cells, respectively<sup>1</sup>. For macrophage detection, cells prepared from BM and splenic tissues were stained with PE-conjugated F4/80 antibody directly.

To determine chimerism in transplantation assays, CD3 (17A2), CD45R/B220 (RA3-6B2) and CD11b (M1/70) antibodies from Biolegend were used to define T cells, B cells,

and myeloid cells, respectively. Antibodies specific for CD45.1 (A20) from eBioscience and CD45.2 (104-2) from Abcam were employed to differentiate donor from recipient cells. Erythropoietic lineages were stained with Ter-119 (Ter-119) antibody, and megakaryocytes and platelets with CD41 (MWReg30) antibody (eBiosciences). Flow cytometric studies were performed on a FACS Aria (BD Bioscience) and data were analyzed by FlowJo software (Tree Star).

### *BM Transplantation*

BM cells were harvested from femur and tibia of gender- and age-matched cognate donor mice, washed, resuspended, and counted in M199 (Sigma M 4530) medium containing DNase (Sigma D-4527), gentamicin, and HEPES. Recipient animals were conditioned one day earlier by lethal irradiation with 1100 rad, administered in 2 fractions with 550 rad (5.5Gy) each at 3 hours apart, using a <sup>137</sup>Cs gamma irradiator (Mark I, 30 J.L. Shepherd). Donor BM cells at  $1 \times 10^6$  cells/mouse were transferred to lethally irradiated recipient mice by tail vein injection. For serial transplantations, secondary recipients were conditioned similarly above and administered next day  $1 \times 10^6$  BM cells collected from primary recipients employing a similar protocol.

### *Tracking cell division in the BM by calvarium intravital microscopy*

LSK cells were sorted from WT and KO mice, stained with DiI or DiD (Invitrogen), respectively, mixed at 1:1 ratio, and injected into naïve WT mice at  $1 \times 10^5$  cells per mouse. Recipient mice were subcutaneously administered 15 µg anti-LYVE-1 antibody (R&D Systems) conjugated with Alexa Fluor-647 (Invitrogen) into a hind footpad 16 hr

before imaging to label mouse microvasculature. The labeled LSK cells were tracked by calvarium intravital microscopy as previously described<sup>2</sup>. LSK cells were tracked and calculated for each video segment using ImageJ software.

#### *Cell cycle analysis*

BM cells were flushed from femur and tibia of indicated mice and stained with antibodies against various lineages, Sca-1 and c-Kit as above. The stained cells were then fixed, permeabilized, and counter-stained overnight with antibody directed at Ki67 (BD Bioscience) followed by a 5 minute incubation with 2µg/ml DAPI (Millipore). The stained cells were then washed with Permashield (BD Bioscience) and analyzed on a FACSAria.

#### *MDS induction and monitoring*

Eight-weeks-old mice of indicated phenotypes were exposed to a single dose of 300 rad (3 Gy) total body irradiation in a <sup>137</sup>Cesium gamma irradiator. Monthly blood smears and complete blood cell counts (CBCs) were evaluated for cytopenias and dysplasia for 8 months. For CBCs, blood (50µl) was collected via tail vein into EDTA-coated microtainer tubes (BD Bioscience) and analyzed on a HemaTrue veterinary hematology analyzer (Heska Corporation). Peripheral blood smears were stained with Wright-Giemsa (Sigma-Aldrich) or new methylene blue (Poly Scientific). Formalin fixed tissues were stained with H&E and reticulin for histological analysis. Microscopic analysis was conducted with a Zeiss Axiophot and images were captured using Picture Frame 2.3 software.

### *Apoptosis detection*

Apoptosis was assayed by flow cytometry using an Annexin V/propidium iodide (PI) Apoptosis Detection Kit (BD Bioscience) or an In Situ Cell Death Detection Kit (terminal deoxynucleotidyl transferase-mediated dUTP nick end labeling or TUNEL) from Roche Applied Science, in accordance to the manufacturer's instructions.

### *Colony-formation assays*

Colony forming assays were performed using cytokine-enriched Methocult M3434 methylcellulose (StemCell Technologies). Colonies were scored under a microscope using protocols provided by Stem Cell Technologies.

### *Tail bleeding times*

Bleeding time was assessed by transecting the mouse tail at 5mm from the tip while in a restrainer (Braintree Scientific). The bleeding tail was immersed in a 15-ml test tube containing phosphate-buffered saline (PBS), which was pre-warmed to 37°C, and time to cessation was measured.

### *Transmission electron microscopy*

BM cells were fixed in Karnovsky's fixative at 4°C for overnight, followed by centrifugation and removal of the fixative. The cell pellets were washed with 0.1 M sodium cacodylate buffer, postfixed in 2% OsO<sub>4</sub> in sodium cacodylate buffer, dehydrated, and embedded in Epon t812 (Tousimis). Ultrathin sections were cut on a

microtome (Reichert-Jung Ultracut E), collected on 200 mesh copper grids, stained with uranyl acetate and lead citrate, and examined on a Philips CM-10 transmission electron microscope (Eindhoven). Images were taken using an undermount XR41M 4 Mpixel cooled camera.

#### *In vivo tracking of platelet formation from megakaryocytes*

Megakaryocytes were sorted from the BM of WT and KO mice after labeling with CD41 antibody, resuspended in 2.5% FBS in PBS, and stained for 15 minutes with 7 $\mu$ M CFSE (Invitrogen). The cells were washed twice with PBS, resuspended, and administered into WT mice at 5x10<sup>5</sup> cells/mouse via tail vein. The resultant CD41<sup>+</sup>CFSE<sup>+</sup> platelets were analyzed by flow cytometry in blood samples collected every other day following the injection.

#### *RBC and Platelet life-span studies*

RBC turnover was measured by *in vivo* biotinylation assays. In brief, 3mg EZ-link-N<sub>ε</sub>-Hydroxysulfosuccinimide-Biotin (NHS-Biotin) (Sigma) was intravenously injected into mice, which is a well-established method to label on average 95% of peripheral RBCs and platelets after one treatment. EZ-NHS-biotin irreversibly binds to the amine rich surface of RBCs and platelets with high affinity, and the labeling can last for their entire life-span. Blood samples were obtained at indicated days and incubated with fluorescein-labeled avidin and phycoerythrin-conjugated TER119 or CD41, followed by flow cytometry.

### *Statistical analysis*

Statistical significance was determined by 2-tailed student's t-test for two group comparison or one way ANOVA for multiple group comparison using Graphpad Prism 5 (Graphpad Software).

### Reference List

1. Challen GA, Boles N, Lin KK, Goodell MA. Mouse hematopoietic stem cell identification and analysis. *Cytometry A*. 2009;75 (1) :14-24.
2. Lo CC, Lin CP, Scadden DT. In vivo imaging of transplanted hematopoietic stem and progenitor cells in mouse calvarium bone marrow. *Nat Protoc*. 2011;6 (1) :1-14.

## 2. Results

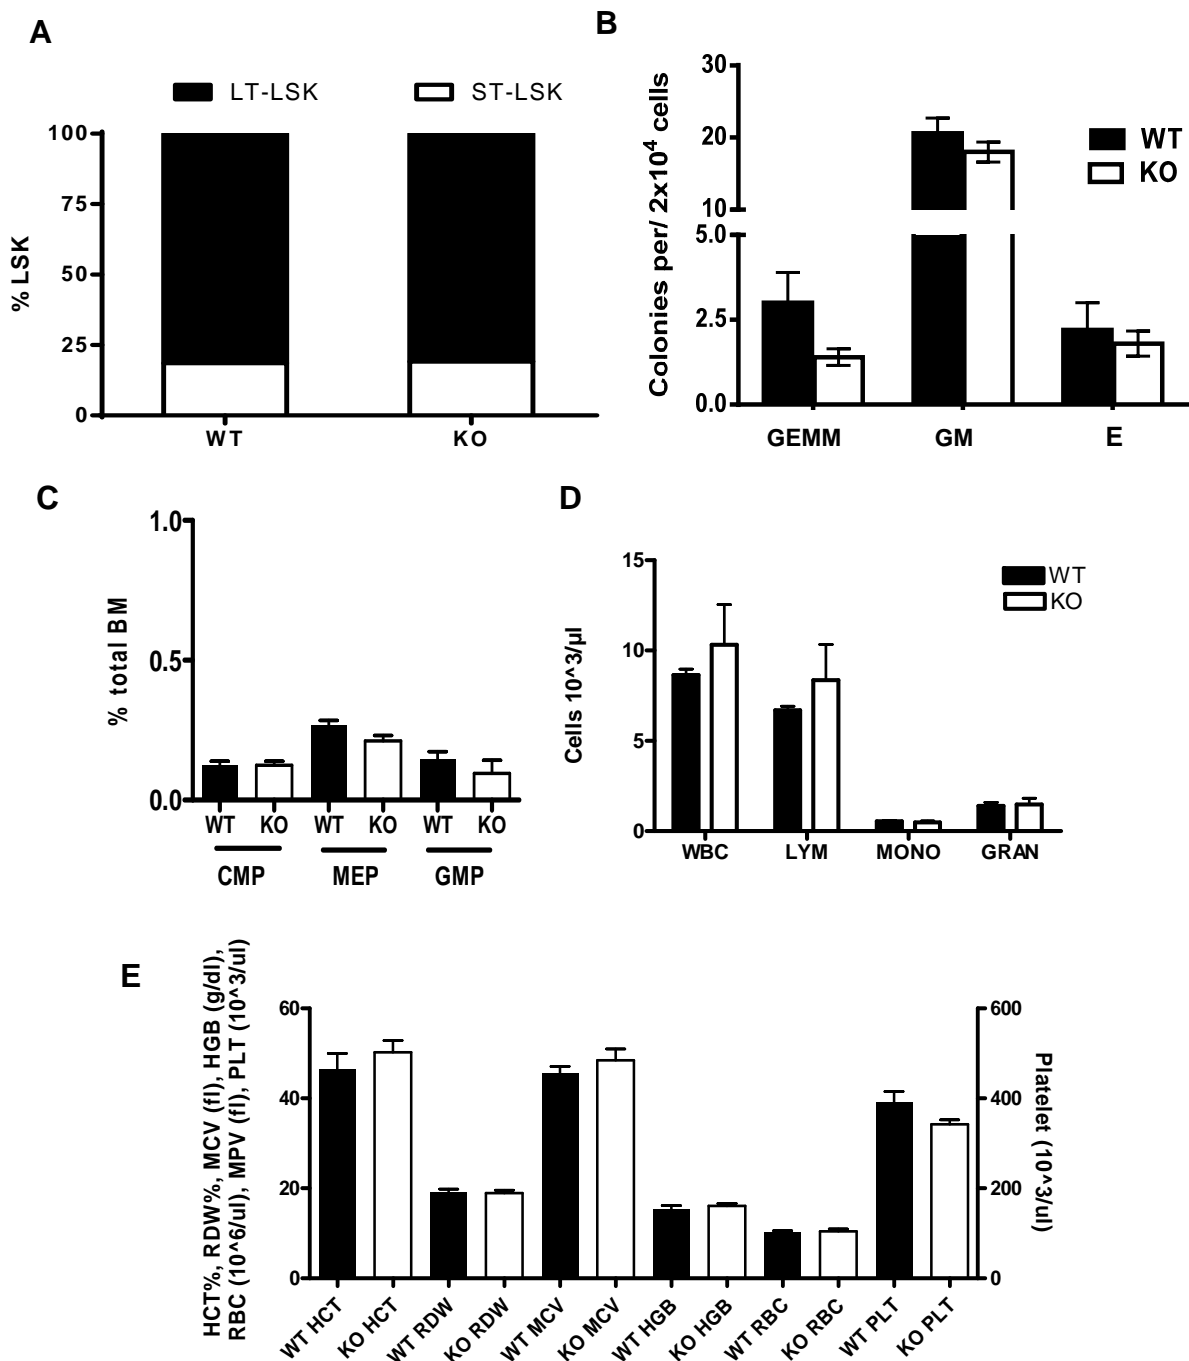

**Figure S1. Hematopoietic analysis in naïve WT and KO mice.**

(A) Long-term- and short-term LSK cells; (B) colony forming units; (C) progenitor and (D-E) peripheral cell analysis in naïve WT and KO mice. No significant differences were noted in all populations measured. n=8 per group



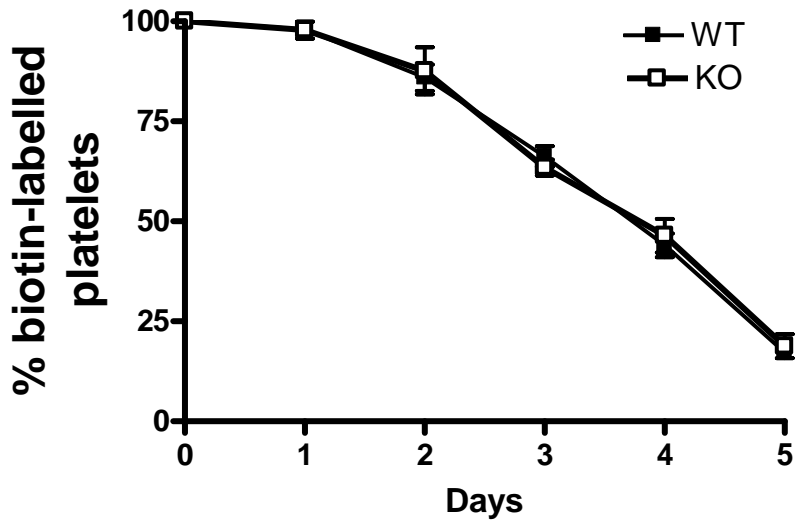

**Figure S2. No differences in lifespan between WT and KO platelets**

Platelets were isolated from blood of indicated mice and biotinylated, followed by tracking the number of biotin-labeled platelets in the circulation daily in cognate recipient mice. The data are expressed as mean percentages  $\pm$  SD relative to the number of labeled platelets on day 0 in the same mice.  $n=5$  for each group.

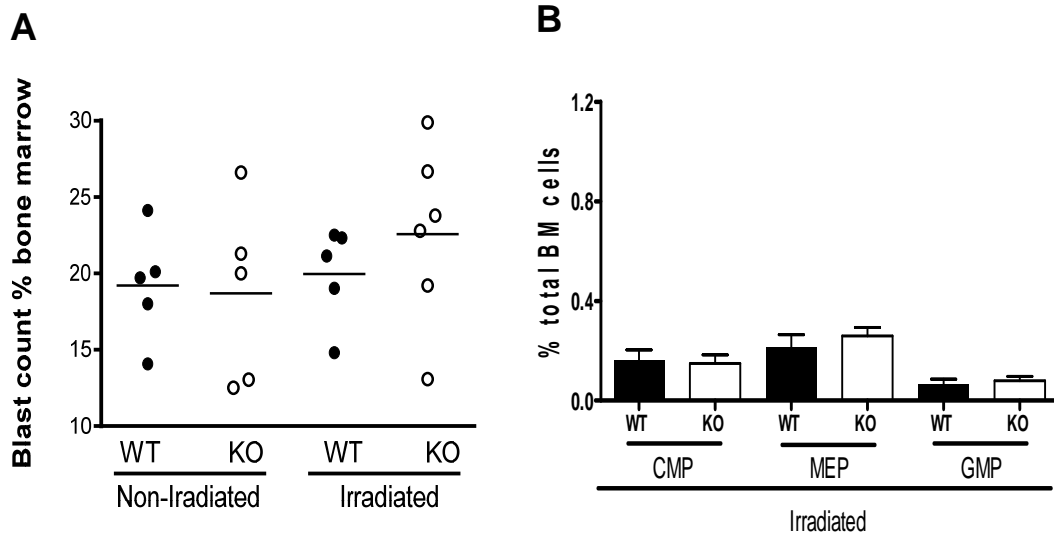

**Figure S3. No significant differences in blast counts (A) and myeloid progenitors (B)**

Blast counts were performed on Wright-Giemsa stained BM brushings prepared from WT and IEX-1 KO mice 8 months post-irradiation or before irradiation. Each symbol in (A) represents a mean percentage of blast counts from 10 different sections prepared from individual mice. The mean percentages  $\pm$  SD relative to total BM cells in (B) were determined in common myeloid (CMP), myeloid erythroid (MEP) or granulocyte macrophage (GMP) progenitors 8 months post-irradiative treatment. n=6 for each group.

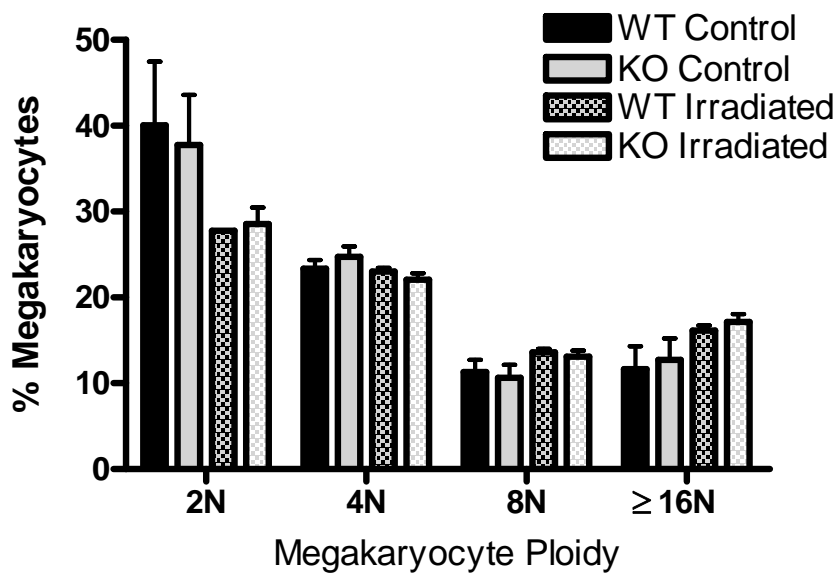

**Figure S4. Megakaryocyte ploidy analysis.**

Intercellular propidium iodide staining was used to determine DNA ploidy of megakaryocytes in the control or irradiated WT and KO mice. The data are expressed as mean percentages  $\pm$  SD of each subsets relative to total megakaryocytes. n=5.

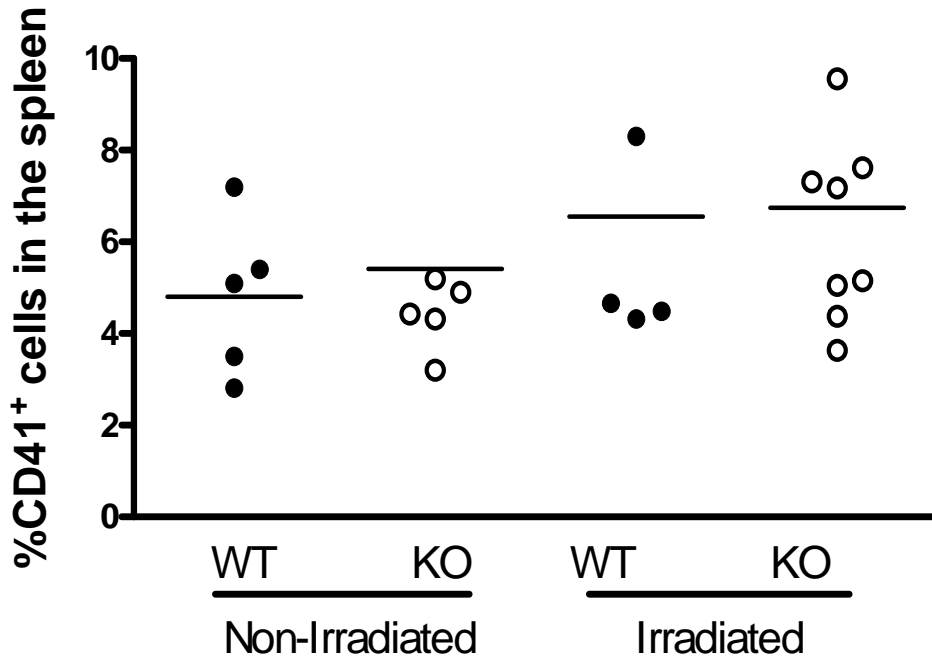

**Figure S5. Splenic megakaryocyte analysis.**

Splenic megakaryocytes were analyzed by flow cytometry after labeling with anti-CD41 antibody in WT and KO mice in 8 months post-TBI or before TBI. Each symbol represents data from individual mice and horizontal bars indicate the mean.
